1 **A SoxB gene acts as an anterior gap gene and**  
2 **regulates posterior segment addition in the spider**  
3 ***Parasteatoda tepidariorum***

4

5 Christian L. B. Paese<sup>1</sup>, Anna Schoenauer<sup>1</sup>, Daniel J. Leite<sup>1</sup>, Steven Russell<sup>2</sup>,  
6 Alistair P. McGregor<sup>1\*</sup>.

7

8 1. Laboratory of Evolutionary Developmental Biology, Department of  
9 Biological and Medical Sciences, Oxford Brookes University, Gipsy Lane,  
10 Oxford, OX3 0BP, UK.

11

12 2. Department of Genetics, University of Cambridge, Downing Street,  
13 Cambridge, CB2 3EH, UK.

14

15 \*To whom correspondence should be addressed: [amcgregor@brookes.ac.uk](mailto:amcgregor@brookes.ac.uk)

16 (A.P.M.)

17

18 Running Head: Sox gene regulation of spider segmentation

19

20 Key words. Sox genes, *Parasteatoda tepidariorum*, spider, evolution,  
21 development.

## 22 **Summary**

23 The Sox gene family encode a set of highly conserved HMG domain  
24 transcription factors that regulate many key processes during metazoan  
25 embryogenesis. In insects, the SoxB gene *Dichaete* is the only Sox gene  
26 known to be involved in embryonic segmentation. To determine if similar  
27 mechanisms are used in other arthropods, we investigated the role of Sox  
28 genes during segmentation in the spider *Parasteatoda tepidariorum*. While  
29 *Dichaete* does not appear to be involved in spider segmentation, RNAi  
30 knockdown of the closely related *Sox21b-1* gene results in a gap like  
31 phenotype in the developing prosoma and also perturbs the sequential  
32 addition of opisthosomal segments. We show that this is in part due to a role  
33 for *Sox21b-1* in regulating the expression of *Wnt8* and influencing Delta-Notch  
34 signalling during the formation of the segment addition zone. Thus, we have  
35 found that two different mechanisms for segmentation in a non-mandibulate  
36 arthropod are regulated by a Group B Sox gene. Our work provides new  
37 insights into the function of an important and conserved gene family across  
38 arthropods, and the evolution of the regulation of segmentation in these  
39 animals.

40

41

## 42 **Introduction**

43 Arthropods are the most speciose and widespread of the animal phyla, and it  
44 is thought that their diversification and success is at least in part explained by  
45 their segmented body plan (1). In terms of development, insects utilise either  
46 derived long germ embryogenesis, where all body segments are made more  
47 or less simultaneously, or short/intermediate germ embryogenesis, where a  
48 few anterior segments are specified and posterior segments are added  
49 sequentially from a growth or segment addition zone (SAZ) (2, 3). It is thought  
50 that segmentation in the ancestral arthropod resembled the short germ mode  
51 seen in most insects (2, 4). Understanding the regulation of segmentation  
52 more widely across the arthropods is important for understanding both the  
53 development and evolution of these highly successful animals.

54 We have a detailed and growing understanding of the regulation of  
55 segmentation in various insects, especially the long germ dipteran *Drosophila*  
56 *melanogaster* and the short germ beetle *Tribolium castaneum*. However,  
57 studies of other arthropods including the myriapods *Strigamia maritima* and  
58 *Glomeris marginata*, and chelicerates, such as the spiders *Cupiennius salei*  
59 and *Parasteatoda tepidariorum*, have provided important mechanistic and  
60 evolutionary insights into arthropod segmentation (2, 5-9). Previous studies  
61 have shown that different genetic mechanisms are used to generate  
62 segments along the anterior-posterior axis of spider embryos. In the anterior  
63 tagma, the prosoma or cephalothorax, the cheliceral and pedipalpal segments  
64 are generated by dynamic waves of *hedgehog* (*hh*) and *orthodenticle* (*otd*)  
65 expression (10, 11). The leg bearing segments are specified by gap gene like  
66 functions of *hunchback* (*hb*) and *distal-less* (*dll*) (12, 13). In contrast, the

67 segments of the posterior tagma, the opisthosoma or abdomen, are  
68 generated sequentially from a SAZ. This process is regulated by dynamic  
69 interactions between Delta-Notch and Wnt8 signalling to regulate *caudal*  
70 (*cad*), which in turn is required for oscillatory expression of pair-rule gene  
71 orthologues including *even-skipped* (*eve*), and *runt* (*run*) (4, 14, 15).  
72 Interestingly, these pair-rule gene orthologues are not involved in the  
73 production of the prosomal segments (15). Therefore, the genetic regulation  
74 of segmentation along the anterior-posterior axis in the spider exhibits  
75 similarities and differences to segmentation in both long germ and short germ  
76 insects.

77         The Group B Sox family gene *Dichaete* is required for correct  
78 embryonic segmentation in the long germ *D. melanogaster*, where it regulates  
79 pair-rule gene expression (16,17). Interestingly, it was recently discovered  
80 that a *Dichaete* orthologue is also involved in segmentation in the short germ  
81 *T. castaneum* (18). This similarity is consistent with work inferring that these  
82 modes of segmentation are more similar than previously thought and provides  
83 insights into how the long germ mode evolved (18, 19, 20). However, it  
84 appears that despite these similarities, *Dichaete* can play different roles in *D.*  
85 *melanogaster* and *T. castaneum* consistent with the generation of segments  
86 simultaneously via a gap gene mechanism in the former and sequentially from  
87 a posterior SAZ in the latter (18).

88         We recently described the discovery of 14 Sox genes in the genome of  
89 the spider *P. tepidariorum* (21) and that several of the spider Sox genes are  
90 represented by multiple copies likely produced during the whole genome  
91 duplication (WGD) in the lineage leading to this arachnid (21). Interestingly,

92 while *Dichaete* is not expressed in a pattern consistent with a role in  
93 segmentation (21), we found that the closely related SoxB gene, *Sox21b-1*, is  
94 expressed in both the prosoma and opisthosoma before and during  
95 segmentation (21). Here we report that in *P. tepidariorum*, *Sox21b-1*,  
96 regulates both prosomal and opisthosomal segmentation. In the prosoma,  
97 *Sox21b-1* has a gap-like gene function and is required for the generation of  
98 the four leg bearing segments. In addition, *Sox21b-1* appears to act upstream  
99 of both *Delta* and *Wnt8* to regulate the formation of the SAZ, and knockdown  
100 of *Sox21b-1* results in truncated embryos missing all opisthosomal segments.  
101 Therefore, while prosomal and opisthosomal segments are generated by  
102 different mechanisms in the spider, our analysis shows that *Sox21b-1* is  
103 required for segmentation in both regions of the developing spider embryo.

104

105

## 106 RESULTS

### 107 ***Sox21b-1* is maternally deposited and is subsequently expressed in the** 108 **germ disc and germ band of spider embryos**

109 We previously identified and assayed the expression of the complement of  
110 Sox genes in the genome of the spider *P. tepidariorum* (21). Our phylogenetic  
111 analysis indicates that *P. tepidariorum Sox21b-1* and its paralog *Sox21b-2* are  
112 members of the Sox group B, closely related to the *Drosophila Dichaete* and  
113 *Sox21b* genes (Fig. S1). In insects (22, 23), *Dichaete*, *Sox21a* and *Sox21b*  
114 are clustered in the genome, however, both *Sox21b* paralogs are dispersed in  
115 the spider genome (21). This suggests that *Sox21b-1* and *Sox21b-2* possibly  
116 arose from the WGD event in the ancestor of arachnopulmonates (24), rather  
117 than by a more recent tandem duplication (20) (Fig. S1).

118 In light of its interesting expression pattern we elected to analyse  
119 *Sox21b-1* further. Pre-vitellogenic *P. tepidariorum* oocytes contain a Balbiani's  
120 body (25), where maternally deposited factors are enclosed, and we found  
121 that *Sox21b-1* is abundant in this region, indicating that it is maternally  
122 contributed (Fig. 1A). However, after fertilization *Sox21b-1* is not expressed  
123 again until early stage 5, when weak expression is detected throughout the  
124 germ disc, with stronger expression in more central cells (Fig. 1B). At late  
125 stage 5, expression becomes more restricted to the centre of the germ disc  
126 (Fig. 1C). During stages 5 and 6, the cumulus migrates to the rim of the germ  
127 disc, opening the dorsal field and giving rise to an axially symmetric germ  
128 band (Fig. 1D) (see 26). In early stage 6 embryos, *Sox21b-1* is observed in  
129 the middle of the presumptive prosoma in a broad stripe (Fig. 1D), which  
130 develops further during stage 7 in the region where the leg bearing segments

131 will form (Fig. 1E). This expression pattern resembles the previously  
132 described expression of the gap gene *hb* (13).

133         During these and subsequent stages, dynamic expression of *Sox21b-1*  
134 is observed in the SAZ and the most anterior region of the germ band that will  
135 give rise to the head segments (Fig. 1F-H). Later in development, the  
136 expression of *Sox21b-1* resembles that of *SoxNeuro* (*SoxN*), another Group B  
137 Sox gene (21). This expression is similar to that of both *SoxN* and *Dichaete* in  
138 *D. melanogaster*, which are expressed in neuroblasts of the neuroectoderm  
139 and then differentiating neurons in the ventral nerve cord (22) (Fig. 1G, H).  
140 Expression of the related group B Sox genes, *Dichaete* and *Sox21b-2* are not  
141 detected in *P. tepidariorum* during embryonic development (20). The  
142 expression of *Sox21b-1* in the embryo suggests that it is involved in both  
143 anterior and posterior segmentation in this spider, as well as later during  
144 nervous system development.

145

#### 146 ***Sox21b-1* regulates prosomal and opisthosomal segmentation**

147 To assay the function of *Sox21b-1* during embryogenesis we knocked down  
148 the expression of the gene using a parental RNAi approach (27). We  
149 observed three phenotypic classes, which were consistent between both of  
150 the non-overlapping *Sox21b-1* fragments we used for RNAi (Fig. 2; Fig. S2;  
151 Table S2).

152         Class I embryos developed a presumptive head region (Fig. 2A-C), as  
153 well as normal cheliceral, pedipalpal and first leg bearing (L1) segments (Fig.  
154 2C). The identity of these segments was confirmed by expression of *labial*  
155 (*lab*) in the pedipalps and L1, and *Deformed-A* (*Dfd-A*) in L1 (Fig S3A-B).

156 However, the other three leg bearing segments, L2 - L4, as well as all of the  
157 opisthosomal segments were missing in Class I embryos. These embryos  
158 exhibited a truncated germ band, terminating in disorganised tissue in the  
159 region of the SAZ (Fig. 2C). In the case of Class II phenotypes, embryos only  
160 differentiated the head region and the cheliceral and pedipalpal segments  
161 (Fig. 2D; Fig S3A-B): all leg bearing segments of the prosoma and  
162 opisthosomal segments produced from the SAZ were missing (Fig. 2D). In  
163 Class III embryos, the germ band did not form properly from the germ disc  
164 (Fig. 2E) and we therefore looked earlier in development to understand how  
165 this severe phenotype arose. We observed that the formation of the primary  
166 thickening occurs normally at stage 4 (27, 28, 29), but subsequently the  
167 cumulus, the group of mesenchymal cells that arise as the primary thickening  
168 at the centre of the germ disc, fails to migrate properly to the rim of the germ  
169 disc during stage 5 (Fig. S4). Since migration of the cumulus is required for  
170 the transition from germ disc to germ band, this observation at least in part  
171 explains the subsequent Class III phenotype. In some embryos, we did  
172 observe the opening of the dorsal field in stage 6 embryos: therefore, we  
173 suggest these embryos later develop Class I and II phenotypes (Fig. S4B-C).

174 We next examined the effect of *Sox21b-1* depletion on cell death and  
175 proliferation at stages 5 and 9 in knockdown and control embryos using  
176 antibodies against Caspase-3 and phosphorylated Histone 3 (PHH3) (Fig.  
177 S5). At the germ disc stage there is no detectable cell death in control  
178 embryos (n = 10), but we observed some small clusters of apoptotic cells in  
179 the *Sox21b-1* knockdown embryos (n = 10) (Fig. S5A-B). At stage 9, a few  
180 cells expressed Caspase-3 in the posterior-most part of the SAZ (Fig. S5C),



181 but we did not observe cell death in this region of *Sox21b-1* knockdown  
182 embryos (Fig. S5D). However, we did observe pronounced cell death in the  
183 anterior extraembryonic layer of the same embryos, (n = 10) (Fig. S5D).

184 Expression of PHH3 at stages 5 and 9, indicated that *Sox21b-1*  
185 knockdown embryos show decreased cell proliferation compared to controls  
186 (n= 10 for each) (Fig. S5E-H). Interestingly the cells were also clearly larger in  
187 *Sox21b-1* knockdown embryos compared to controls, which may reflect  
188 perturbed cell proliferation (Fig. S5E-H). Thus, our functional analysis shows  
189 that *Sox21b-1* regulates cell proliferation and the transition from radial to axial  
190 symmetry. Moreover, *Sox21b-1* is involved in two different segmentation  
191 mechanisms in spiders: it has a gap gene like function in the prosoma, as well  
192 as a requirement for the formation of the SAZ and subsequent production of  
193 opisthosomal segments.

194

#### 195 **Effects of *Sox21b-1* knockdown on the germ disc and mesoderm**

196 In *P. tepidariorum*, *decapentaplegic* (*dpp*) and *Ets4* are required for cumulus  
197 formation (29, 30). To investigate if *Sox21b-1* is involved in the formation of  
198 this cell cluster we assayed the expression of *dpp* and *ets4* in *Sox21b-1* RNAi  
199 knockdown embryos. However, both genes were expressed normally and  
200 cumulus formation was unaffected (Fig. 3 E, F).

201 The rim of the spider germ disc develops into the head structures and  
202 is regulated in part by *hh*, while the mesodermal and endodermal layers of the  
203 head are specified by the mesendodermal gene *forkhead* (*fkh*) (10, 27). To  
204 investigate if anterior expression of *Sox21b-1* (Fig. 1B) is involved in the  
205 formation of the head rudiment and differentiation of the mesodermal and

206 endodermal layers in particular, we assayed the expression of *hh* and *fkh* in  
207 class I and II *Sox21b-1* knockdown embryos.

208 *hh* is expressed at the rim of the germ disc in the ectoderm (Fig. 3 D)  
209 (31) and remains unaffected by *Sox21b-1* knockdown (Fig. 3H). *fkh* is also  
210 expressed in cells around the rim, as well as in the centre of the germ disc in  
211 mesendodermal cells (Fig. 3C). In *Sox21b-1* knockdown embryos both of  
212 these *fkh* expression domains are lost (Fig. 3G) and it therefore appears that  
213 *Sox21b-1* is required for specification of mesendodermal cells in the germ  
214 disc of spider embryos. Indeed in the germ disc at stage 5, when *fkh*  
215 expression commences, we observed invaginating cells forming a second  
216 layer (Fig. S3G), however, in *Sox21b-1* knockdown embryos we observed a  
217 lower number of invaginating cells, which exhibit bigger nuclei compared to  
218 the controls (Fig. S3H).

219 In both spiders and flies, the *twist* (*twi*) gene is involved in mesoderm  
220 specification (32) and we therefore examined the expression of this gene after  
221 *Sox21b-1* knockdown to further evaluate if the loss of *fkh* affects the formation  
222 of the internal layers. *twi* is expressed in the visceral mesoderm of the limb  
223 buds from L1 to L4, in the opisthosomal segments O1 to O4 and in an anterior  
224 mesodermal patch in the central part of the developing head (32) (Fig. S3E).  
225 While the head expression persists in *Sox21b-1* class I embryos, expression  
226 in all the limb and opisthosomal segments is lower or absent (Fig. S3F). In  
227 orthogonal projections the anterior-most region of the embryo three layers of  
228 cells can be identified in control embryos (Fig. S3I). However, in *Sox21b-1*  
229 knockdown embryos the formation of these layers is perturbed (Fig. S3J).

230 These data suggest that the ectodermal segmentation in the prosomal region  
231 occurs even upon a reduction of the internal layers of the embryo.

232

### 233 **Effects of *Sox21b-1* knockdown on segmentation**

234 In *P. tepidariorum*, formation of the SAZ and production of posterior segments  
235 requires the Wnt8 and Delta-Notch signalling pathways (14, 15). Interactions  
236 between these pathways regulate *hairy* (*h*) and, via *cad*, the expression of  
237 pair-rule gene orthologues including *eve* (14, 15). To better understand the  
238 loss of segments we observe in *Sox21b-1* knockdown embryos we analysed  
239 the expression of *DI*, *Wnt8*, *h* and *cad* in these embryos compared to controls.

240 *DI* is expressed at stages 5 and 6 in the forming SAZ, in the region of  
241 the L4 primordia, and in the presumptive head (33) (Fig. 4A). Subsequently at  
242 stage 9, *DI* expression is visible in clusters of differentiating neuronal cells and  
243 oscillates in the SAZ, an expression pattern associated with the sequential  
244 addition of new segments (Fig. 4B). In *Sox21b-1* knockdown embryos, *DI*  
245 expression is not detected at stage 5 (Fig. 4C) and is absent in the posterior  
246 at stage 9 (Fig. 4D). However, expression in the anterior neuroectoderm  
247 seems normal up to the pedipalpal segment, although neurogenesis is  
248 apparently perturbed in the presumptive L1 segment (Fig. 4D). This suggests  
249 that the ectoderm up to the L1 segment differentiates normally, but the  
250 development of the SAZ and posterior segment addition controlled by *DI* is  
251 lost upon *Sox21b-1* knockdown.

252 *Wnt8* is initially expressed at stage 5 in the centre and at the rim of the  
253 germ disc (Fig. 4E). At stage 9, striped expression of *Wnt8* is seen from the  
254 head to the posterior segments and in the posterior cells of the SAZ (Fig. 4G).

255 Knockdown of *Sox21b-1* results in the loss of *Wnt8* expression in late stage 5  
256 embryos (Fig. 4F). At stage 9, *Wnt8* expression is observed in the cheliceral,  
257 pedipalpal and first walking limb segments of *Sox21b-1* knockdown embryos,  
258 but no expression is detected in the remaining posterior cells (Fig. 4H).  
259 Consistent with the loss of *DI* and *Wnt8*, *cad* expression is also lost in stage 5  
260 and stage 9 *Sox21b-1* knockdown embryos (Fig. 4I-L). These observations  
261 indicate that *Sox21b-1* acts upstream of *Wnt8* and Delta-Notch signalling to  
262 regulate the formation of the SAZ and the subsequent production of posterior  
263 segments. In support of this regulatory relationship we find that *Sox21b-1*  
264 expression is still detected in the posterior regions of the truncated embryos  
265 produced by RNAi knockdown of either *DI* or *Wnt8* (Fig. 5).

266 The spider orthologue of *h* is expressed in the presumptive L2-L4  
267 segments and dynamically in the SAZ (14) (Fig. 4M, O). In late stage 5  
268 *Sox21b-1* knockdown embryos, the expression of *h* is lost throughout the  
269 entire germ disc (Fig. 4N). In addition, in Class I phenotype embryos at stage  
270 9, the expression of *h* is completely absent in the tissue posterior to the  
271 pedipalpal segment (Fig. 4P). Therefore the loss of *h* expression is consistent  
272 with the loss of leg bearing segments in the anterior gap-like phenotype that  
273 results from knockdown of *Sox21b-1* as well as loss of segments produced by  
274 the SAZ.

275 To look at the effect of *Sox21b-1* knockdown on segmentation in more  
276 detail we examined the expression of *engrailed* (*en*) and *hh*. At stage 9 *en* is  
277 expressed segmentally from the cheliceral to the O3 segment in control  
278 embryos (Fig. 4Q). However, in *Sox21b-1* knockdown embryos, expression of  
279 *en* was only observed in the cheliceral, pedipalpal and L1 segments,

280 consistent with the loss of all the more posterior segments (Fig. 4S). *hh* has a  
281 similar expression pattern to *en* at stage 9, except it exhibits an anterior  
282 splitting wave in the cheliceral segment and is also expressed earlier in  
283 opisthosomal segments and in the SAZ (Fig. 4R). Upon *Sox21b-1*  
284 knockdown, *hh* is only detected in shortened stripes in the cheliceral and  
285 pedipalpal segments (Fig. 4T).

286 Taken together, our analysis of *P. tepidariorum* embryos where  
287 *Sox21b-1* is depleted by parental RNAi reveals an important role for this  
288 Group B Sox gene in both gap-like segmentation of the prosoma, as well as  
289 posterior segment formation from the SAZ. These experiments further  
290 emphasise the critical role this class of transcription factors play in arthropod  
291 segmentation.

292

293 **Discussion**

294 *A SoxB gene is required for two different mechanisms of spider segmentation*

295 The Sox (Sry-Related High-Mobility Group box) gene family encodes  
296 transcription factors that regulate many important processes underlying the  
297 embryonic development of metazoans (34-37). One such gene, *Dichaete*, is  
298 expressed in a gap gene pattern and is involved in regulating the canonical  
299 segmentation cascade in *D. melanogaster* (16, 17). Recently, the analysis of  
300 the expression of *Dichaete* in the flour beetle *T. castaneum* strongly suggests  
301 a role in short germ segmentation (18), further supported by knockdown of the  
302 *Dichaete* orthologue in *Bombyx mori*, which resulted in the loss of posterior  
303 segmentation (38).

304 Here we show that, while *Dichaete* is not involved in spider  
305 segmentation (21), the closely related SoxB gene, *Sox21b-1*, regulates  
306 formation of both prosomal and opisthosomal segments. In the prosoma  
307 *Sox21b-1* has a gap gene role and is required for the specification of L1-L4  
308 segments (Fig. 6), resembling the roles of *hb* and *Dll* in prosomal  
309 segmentation in this spider (12, 13) and, at least superficially, gap gene  
310 function in *Drosophila*.

311 In *Drosophila* the gap genes regulate pair rule gene expression, and  
312 while our results indicate that *Sox21b-1* is required for the expression of *h* and  
313 the generation of leg bearing prosomal segments (Fig 4E; Fig. 6), in contrast  
314 to insects, in spiders this does not involve the orthologues of *eve* and *runt*  
315 because they are not expressed in the developing prosomal segments (15,  
316 39).

317 In the posterior, *Sox21b-1* knockdown perturbs SAZ formation and  
318 consequently results in truncated embryos missing all opisthosomal  
319 segments. Therefore, *Sox21b-1* regulates development of the SAZ, and our  
320 observations indicate this is at least in part through roles in organising the  
321 germ layers and specification of mesendodermal cells during stages 5 and 6.  
322 This is supported by the loss of *fkh* expression upon *Sox21b-1* knockdown,  
323 which is required for mesoderm and endoderm formation in both spiders and  
324 insects (10, 40, 41). Moreover, the subsequent dynamic expression of  
325 *Sox21b-1* in the SAZ after stage 6 is suggestive of a role in segment addition.

326 Our work on *Sox21b-1* provides an important new insight into the gene  
327 regulatory network (GRN) underlying the formation of the SAZ and the  
328 sequential addition of segments from this tissue. We show that *Sox21b-1* acts  
329 upstream of Wnt8 and Delta-Notch signalling in this GRN and is required for  
330 the activation of these important signalling pathways during posterior  
331 development (Fig. 6). Further work is needed to determine if Group B Sox  
332 genes, such as *Dichaete* and *Sox21b-1*, occupy a similar position in the  
333 regulatory hierarchy for posterior segmentation in other arthropods. This could  
334 provide important new insights into the evolution of the regulation of  
335 segmentation in arthropods since a Wnt-Delta-Notch-Cad regulatory cassette  
336 was probably used ancestrally in arthropods to regulate posterior  
337 development (4, 8, 9, 14, 15, 42). Interestingly, SoxB genes also cooperate  
338 with Wnt and Delta-Notch signalling in various aspects of vertebrate  
339 development including the patterning of neural progenitors and maintenance  
340 of the stem state in the neuroepithelium (35, 43, 44, 45).

341

342 *Sox21b-1* exhibits highly pleiotropic phenotypes during early spider  
343 embryogenesis

344 Our study shows that *Sox21b-1* is not only involved in segmentation but is  
345 maternally supplied and regulates cell division in the early germ disc, as well  
346 as the transition from radial to axial symmetry during germ band formation.  
347 Further experiments with *Sox21b-1* are required to fully elucidate the  
348 mechanisms by which it affects these early functions. Furthermore, while  
349 spider head development is less affect than trunk segmentation by  
350 knockdown of *Sox21b-1*, it is clear from our experiment that *Sox21b-1*  
351 regulates cell fate in this region. Interestingly, Sox2 is involved with the neuro-  
352 mesodermal fate choice in mice and *Dichaete* has a role in embryonic brain  
353 development in *Drosophila* (45, 46): consequently, SoxB genes may play an  
354 ancestral role in the patterning of the head ectoderm and mesoderm in  
355 metazoans (45, 46).

356

357 *The evolution of Sox21b-1*

358 The evolution and diversification of Group B Sox genes in insects is not fully  
359 resolved due to difficulties in clearly assigning orthologues based on the  
360 highly conserved HMG domain sequence (17, 35, 47). However, despite  
361 these ambiguities it is clear that the *Dichaete* and *Sox21b* class genes in all  
362 arthropods examined to date are closely related and likely arose from a  
363 duplication in the common ancestor of this phylum (see 47 for discussion).  
364 Note that in insects *Dichaete*, *Sox21a* and *Sox21b* are clustered (29),  
365 however, while *Dichaete* and *Sox21a* are also clustered in *P. tepidariorum*,  
366 the *Sox21b* paralogs are dispersed in the genome of this spider (21). We



367 believe it is highly significant that two very closely related SoxB genes are  
368 involved in segmentation in both the spider *P. tepidariorum* and in insects,  
369 pointing to an ancient role for this subfamily of Sox genes in invertebrates.  
370 Given the close similarity between the HMG domains of Sox21b and  
371 Dichaete, it is possible that in some lineages the Dichaete orthologue  
372 assumed the segmentation role, whereas in others it was Sox21b. In spiders,  
373 *Wnt8* is involved in posterior development while in other arthropods this role is  
374 played by *Wnt1/wg* (14), and therefore the evolution of *Sox21b-1* may have  
375 led to the co-option to different genes and developmental systems drift of the  
376 GRN for posterior development.

377         The spider contains an additional related SoxB gene, *Sox21b-2*, that  
378 possibly arose as part of the whole genome duplication event in the ancestor  
379 of arachnoplumonates over 400 million years ago (22). It will be interesting to  
380 examine any segmentation roles in other spiders and arachnids, including  
381 those that did not undergo a genome duplication. Finally, Blast searches of  
382 the Tardigrade *Hypsibius dujardini* genome reveal a single *Dichaete/Sox21b*  
383 class gene and it will be of some interest to characterise the expression  
384 and/or function of this gene in this sister group to the arthropods.

385

386

## 387 **Materials and Methods**

### 388 **Spider Culture**

389 *P. tepidariorum* were cultured at 25°C at Oxford Brookes University. The  
390 spiders were fed with *D. melanogaster* with vestigial wings and subsequently  
391 small crickets (*Gryllus bimaculatus*). Cocoons from mated females were  
392 removed and a small number of embryos were immersed in halocarbon oil for  
393 staging according to (26).

394

### 395 **Phylogenetic analysis of *P. tepidariorum* Sox genes**

396 To identify the phylogenetic relationship of *P. tepidariorum* Sox genes the  
397 HMG domains of *Anopheles gambiae*, *Mus musculus*, *D. melanogaster*, *P.*  
398 *tepidariorum* and *S. mimosarum* Sox genes were aligned with ClustalW (21,  
399 48). Phylogenetic analysis was performed in RAxML, with support levels  
400 estimated implementing the rapid bootstrap algorithm (1000 replicates) (49),  
401 under the PROTGAMMALG model of amino acid substitution, which was  
402 identified as best fitting using a custom Perl script from the Exelixis Lab  
403 website ([https://sco.h-its.org/exelixis/web/software/raxml/hands\\_on.html](https://sco.h-its.org/exelixis/web/software/raxml/hands_on.html)).

404

### 405 **Fixation and gene expression analysis**

406 Embryos ranging from the 1-cell stage to stage 13 were dechorionated and  
407 fixed according to (31) with a longer fixation time of 1 hr to facilitate yolk  
408 removal for flat-mounting. For immunohistochemistry, methanol steps were  
409 omitted. Ovaries from adult females were dissected in 1x PBS and fixed in 4%  
410 formaldehyde for 30 min. Probe synthesis and RNA *in situ* hybridisation was  
411 carried out with minor modifications to (27), omitting Proteinase K treatment

412 and post-fixation steps. Poly-L-lysine (Sigma-Aldrich) coated coverslips were  
413 used for flat-mounting embryos. Nuclei were stained by incubating embryos in  
414 1 µg/ml 4-6-diamidino-2-phenylindol (DAPI) in PBS with 0.1% Tween-20 for  
415 15 min.

416

#### 417 **Imaging, Live Imaging and Image Analysis**

418 For imaging of flat-mounted embryos after *in situ* hybridisation, an AxioZoom  
419 V16 stereomicroscope (Zeiss) equipped with an Axiocam 506-Mono and a  
420 colour digital camera were used. Immunostained embryos were imaged with  
421 Zeiss LSM 800 or 880 with Airyscan confocal microscopes. For live imaging,  
422 embryos were aligned on heptane glue coated coverslips and submersed in a  
423 thin layer of halocarbon oil. Bright-field live imaging was performed using an  
424 AxioZoom V16 stereomicroscope, while fluorescence live imaging was  
425 performed with confocal microscopes. Image stacks were processed in Fiji  
426 (50) and Helicon Focus (HeliconSoft). Image brightness and intensity was  
427 adjusted in Corel PhotoPaint X5 (CorelDraw) and Fiji.

428

#### 429 **Gene Isolation from cDNA**

430 Fragment of genes were amplified using PCR and cloned into pCR4-TOPO  
431 (Invitrogen, Life Technologies). Oligonucleotide sequences are listed in Table  
432 S1.

433

#### 434 **Immunohistochemistry**

435 Immunostaining was carried out following (51) with minor modifications:  
436 antibodies were not pre-absorbed prior to incubation and the concentration of

437 Triton was increased to 0.1%. The following primary antibodies were used:  
438 mouse anti- $\alpha$ -Tubulin DM1a (Sigma) (1:50), rabbit  $\alpha$  cleaved caspase 3 (Cell  
439 Signaling - 9661) (1:200) and rabbit Anti-phospho-Histone H3 (Ser10) (Merck  
440 Millipore - 06-570). For detection the following secondary antibodies were  
441 used: donkey anti-mouse IgG Alexa Fluor 555 (Invitrogen) and goat anti-rabbit  
442 Alexa Fluor 647 (Invitrogen). The counterstaining was carried out by  
443 incubation in 1  $\mu$ g/ml 4-6-diamidino-2-phenylindol (DAPI) in PBS + Triton  
444 0,1% for 20 minutes.

445

#### 446 **dsRNA synthesis and Parental RNA interference**

447 Double stranded RNA (dsRNA) for parental RNA interference was  
448 synthesized according to (15) and injected following the standard protocol  
449 from (27). Two non-overlapping fragments of *P. tepidariorum Sox21b-1* were  
450 isolated from the 1134 bp coding sequence of the gene: fragment 1 spanning  
451 549 bp and fragment 2 covering 550 bp. Double stranded RNA for *P.*  
452 *tepidariorum Dl* (853 bp), *Wnt8* (714 bp) and the coding sequence of GFP  
453 (720 bp) as used previously (27), were transcribed using the same method.  
454 Synthesis of double stranded RNA was performed using the MegaScript T7  
455 transcription kit (Invitrogen). After purification the dsRNA transcripts were  
456 annealed in a water bath starting at 95°C and slowly cooled down to room  
457 temperature. dsRNA was injected at 2.0  $\mu$ g/ $\mu$ l in the opisthosoma of adult  
458 females every two days, with a total of five injections (n = 7 for each dsRNA;  
459 n= 2 for GFP controls). The injected spiders were mated after the second  
460 injection and embryos from injected spiders were fixed for gene expression  
461 and phenotypic analyses at three different time points: stage 4 (cumulus

462 formation), stage 5 late (germ disc with migrating cumulus) and stage 9 (head  
463 and limbs bud formation).

464

#### 465 **Supplemental Information**

466 Supplemental Information includes five figures and two tables.

467

#### 468 **Declaration of Interest**

469 The authors declare no competing interests.

470

#### 471 **Author Contributions**

472 CLBP, SR and APM designed the project for the paper. CLBP and AS  
473 performed most of the experiments. DJL and SR carried out the genomic and  
474 bioinformatic analysis. CLBP, SR and APM wrote the manuscript with the help  
475 of DJL and AS.

476

#### 477 **Acknowledgements**

478 This research was funded by a CNPq scholarship to CLBP (234586/2014-1),  
479 a grant from The Leverhulme Trust (RPG-2016-234) to APM and AS, and in  
480 part by a BBSRC grant (BB/N007069/1) to SR.

481

#### 482 **References**

- 483 1. Tautz D (2004) Segmentation. *Dev Cell* 7:301-312.
- 484 2. Peel AD, Chipman AD, & Akam M (2005) Arthropod segmentation:  
485 beyond the *Drosophila* paradigm. *Nat Rev Genet* 6:905-916.
- 486 3. Davis GK & Patel NH (2002) Short, long, and beyond: molecular and  
487 embryological approaches to insect segmentation. *Annu Rev Entomol*  
488 47:669-699.

- 489 4. McGregor AP, Pechmann M, Schwager EE, Damen WG (2009) An  
490 ancestral regulatory network for posterior development in arthropods.  
491 *Commun Integr Biol* 2:174-176.
- 492 5. Hilbrant M, Damen WG, & McGregor AP (2012) Evolutionary  
493 crossroads in developmental biology: the spider *Parasteatoda*  
494 *tepidariorum*. *Development* 139:2655-2662.
- 495 6. McGregor AP, et al. (2008) *Cupiennius salei* and *Achaearanea*  
496 *tepidariorum*: Spider models for investigating evolution and  
497 development. *Bioessays* 30:487-498.
- 498 7. Leite DJ & McGregor AP (2016) Arthropod evolution and development:  
499 recent insights from chelicerates and myriapods. *Curr Opin Genet Dev*  
500 39:93-100.
- 501 8. Janssen R, Prpic NM, Damen WGM (2004) Gene expression suggests  
502 decoupled dorsal and ventral segmentation in the millipede *Glomeris*  
503 *marginata* (Myriapoda: Diplopoda). *Dev Biol* 269: 84-104
- 504 9. Brena C, Akam M (2012) The embryonic development of the centipede  
505 *Strigamia maritima*. *Dev Biol* 363: 290-307
- 506 10. Kanayama M, et al. (2011) Travelling and splitting of a wave of  
507 hedgehog expression involved in spider-head segmentation. *Nat*  
508 *Commun* 2:500.
- 509 11. Pechmann M, McGregor AP, Schwager EE, Feitosa NM, Damen WG  
510 (2009) Dynamic gene expression is required for anterior regionalization  
511 in a spider. *Proc Natl Acad Sci U S A* 106:1468-1472.
- 512 12. Pechmann M, et al. (2011) Novel function of *Distal-less* as a gap gene  
513 during spider segmentation. *PLoS Genet* 7:e1002342.
- 514 13. Schwager EE, Pechmann M, Feitosa NM, McGregor AP, Damen WG  
515 (2009) *hunchback* functions as a segmentation gene in the spider  
516 *Achaearanea tepidariorum*. *Curr Biol* 19:1333-1340.
- 517 14. McGregor AP, et al. (2008) *Wnt8* is required for growth-zone  
518 establishment and development of opisthosomal segments in a spider.  
519 *Curr Biol* 18:1619-1623.
- 520 15. Schönauer A, et al. (2016) The Wnt and Delta-Notch signalling  
521 pathways interact to direct even-skipped expression via caudal during

- 522 segment addition in the spider *Parasteatoda tepidariorum*.  
523 *Development* 143:2455-2463.
- 524 16. Nambu PA, JR Nambu (1996) The *Drosophila* fish-hook gene encodes  
525 a HMG domain protein essential for segmentation and CNS  
526 development. *Development* 122: 3467–3475.
- 527 17. Russell SRH, Sanchez-Soriano N, Wright CR, Ashburner M (1996) The  
528 *Dichaete* gene of *Drosophila melanogaster* encodes a SOX-domain  
529 protein required for embryonic segmentation. *Development*, 122:3669-  
530 3676.
- 531 18. Clark E & Peel AD (2017) Evidence for the temporal regulation of  
532 insect segmentation by a conserved set of developmental transcription  
533 factors. *bioRxiv*.
- 534 19. Clark E (2017) Dynamic patterning by the *Drosophila* pair-rule network  
535 reconciles long-germ and short-germ segmentation. *PLoS Biol*  
536 15:e2002439.
- 537 20. Verd B, et al. (2018) A damped oscillator imposes temporal order on  
538 posterior gap gene expression in *Drosophila*. *PLoS Biol* 16:e2003174.
- 539 21. Paese CLB, Leite DJ, Schoenauer A, McGregor AP, & Russell S  
540 (2017) Duplication and divergence of Sox genes in spiders. *bioRxiv*.
- 541 22. McKimmie C, Woerfel G, Russell S (2005) Conserved genomic  
542 organisation of group B Sox genes in insects. *BMC Genetics*, 6:26.21-  
543 26.15.
- 544 23. Wilson MJ, Dearden PK (2008) Evolution of the insect Sox genes.  
545 *BMC Evol Biol*, 8:120.
- 546 24. Schwager EE, et al. (2017) The house spider genome reveals an  
547 ancient whole-genome duplication during arachnid evolution. *BMC Biol*  
548 15(1):62.
- 549 25. Jędrzejowska I & Kubrakiewicz IJ (2007) The Balbiani body in the  
550 oocytes of a common cellar spider, *Pholcus phalangioides* (Araneae:  
551 Pholcidae). *Arthropod Struct Dev*, 36: 317-326.
- 552 26. Mittmann B, Wolff C (2012) Embryonic development and staging of the  
553 cobweb spider *Parasteatoda tepidariorum* C. L. Koch, 1841 (syn.:  
554 *Achaeearanea tepidariorum*; *Araneomorphae*; *Theridiidae*). *Dev Genes*  
555 *Evol*, 222:189-216.

- 556 27. Akiyama-Oda Y, Oda H (2003) Early patterning of the spider embryo: a  
557 cluster of mesenchymal cells at the cumulus produces Dpp signals  
558 received by germ disc epithelial cells. *Development*, 130:1735-1747.
- 559 28. Pechmann M (2016) Formation of the germ-disc in spider embryos by  
560 a condensation-like mechanism. *Frontiers in Zoology* 13:35
- 561 29. Pechmann M, et al. (2017) A novel role for Ets4 in axis specification  
562 and cell migration in the spider *Parasteatoda tepidariorum*. *eLife*, 6: 1-  
563 20.
- 564 30. Akiyama-Oda Y, Oda H (2006) Axis specification in the spider embryo:  
565 dpp is required for radial-to-axial symmetry transformation and sog for  
566 ventral patterning. *Development*, 133: 2347-2357.
- 567 31. Akiyama-Oda Y, Oda H (2016) Multi-color FISH facilitates analysis of  
568 cell-type diversification and developmental gene regulation in the  
569 *Parasteatoda* spider embryo. *Dev Growth Differ*, 58:215-224.
- 570 32. Yamazaki K, Akiyama-Oda Y, Oda H (2005) Expression Patterns of a  
571 twist-Related Gene in Embryos of the Spider *Achaearanea*  
572 *tepidariorum* Reveal Divergent Aspects of Mesoderm Development in  
573 the Fly and Spider. *Zool Sci* 22: 177-185.
- 574 33. Oda H, et al. (2007) Progressive activation of Delta-Notch signaling  
575 from around the blastopore is required to set up a functional caudal  
576 lobe in the spider *Achaearanea tepidariorum*. *Development*, 134: 2195-  
577 2205.
- 578 34. Overton PM, Meadows LA, Urban J and Russell S (2002) Evidence for  
579 differential and redundant function of the Sox genes *Dichaete* and  
580 *SoxN* during CNS development in *Drosophila*. *Development* 129: 4219-  
581 4228.
- 582 35. Wegner, M (1999) From head to toes: the multiple facets of Sox  
583 proteins. *Nucleic Acids Research* 27:1409–1420.
- 584 36. Sinclair AH et al (1990) A gene from the human sex-determining region  
585 encodes a protein with homology to a conserved DNA-binding motif.  
586 *Nature* 346: 240-244.
- 587 37. Lefebvre V (2010) The SoxD transcription factors – Sox5, Sox6, and  
588 Sox13 – are key cell fate modulators. *Int J Biochem Cell Biol* 42:429–  
589 432.



- 590 38. Nakao H (2018) A Bombyx homolog of ovo is a segmentation gene that  
591 acts downstream of Bm-wnt1(Bombyx wnt1 homolog). *Gene*  
592 *Expression Patterns* 27: 1-7.
- 593 39. Damen WGM, Weller M, Tautz D (2000) Expression patterns of hairy,  
594 even-skipped, and runt in the spider Cupiennius salei imply that these  
595 genes were segmentation genes in a basal arthropod. *PNAS*, 97:  
596 4515-4519.
- 597 40. Feitosa NM, Pechmann M, Schwager EE, et al (2017) Molecular  
598 control of gut formation in the spider Parasteatoda tepidariorum.  
599 *genesis* 55: 23-33.
- 600 41. Lan, Q., Cao, M., Kollipara, R. K., Rosa, J. B., Kittler, R. and Jiang, H  
601 (2017) FoxA transcription factor Fork head maintains the intestinal  
602 stem/progenitor cell identities in Drosophila. *Dev Biol* 433:324-343.
- 603 42. Pueyo JI, Lanfear R, Couso JP (2008) Ancestral Notch-mediated  
604 segmentation revealed in the cockroach Periplaneta americana.  
605 *Proceedings of the National Academy of Sciences*, 105: 16614-16619.
- 606 43. Holmberg J, et al. (2008) SoxB1 transcription factors and Notch  
607 signaling use distinct mechanisms to regulate proneural gene function  
608 and neural progenitor differentiation. *Development* 135: 1843-1851.
- 609 44. Kormish JD, Sinner D, Zorn, AM (2010) Interactions between SOX  
610 factors and Wnt/ $\beta$  - catenin signaling in development and disease.  
611 *Dev Dyn* 239: 56-68.
- 612 45. Koch F, et al (2017) Antagonistic Activities of Sox2 and Brachyury  
613 Control the Fate Choice of Neuro-Mesodermal Progenitors. *Dev Cell*  
614 42: 514-526.
- 615 46. Sanchez-Soriano N, Russell S (1998) The Drosophila Sox-domain  
616 protein Dichaete is required for the development of the central nervous  
617 system midline. *Development* 125:3989-3996.
- 618 47. Zhong L, Wang D, Gan X, Yang T, He S (2011) Parallel Expansions of  
619 Sox Transcription Factor Group B Predating the Diversifications of the  
620 Arthropods and Jawed Vertebrates. *PLoS ONE*, 6:e16570.
- 621 48. Larkin MA, et al. (2007) Clustal W and Clustal X version 2.0.  
622 *Bioinformatics* 23: 2947-2948.

- 623 49. Stamatakis, et al. (2008) A rapid bootstrap algorithm for the RAxML  
624 Web servers. *Syst Biol* 57: 758-771.
- 625 50. Schindelin J, et al. (2012) Fiji: an open-source platform for biological-  
626 image analysis. *Nature Methods* 9: 676–682.
- 627 51. Schwager EE, Meng Y, Extavour CG (2015) vasa and piwi are required  
628 for mitotic integrity in early embryogenesis in the spider *Parasteatoda*  
629 *tepidariorum*. *Dev Biol* 402: 276-290.
- 630  
631  
632  
633  
634  
635  
636  
637  
638  
639  
640  
641  
642  
643  
644  
645  
646  
647  
648  
649  
650  
651  
652  
653  
654  
655  
656

657 **Figures**

658

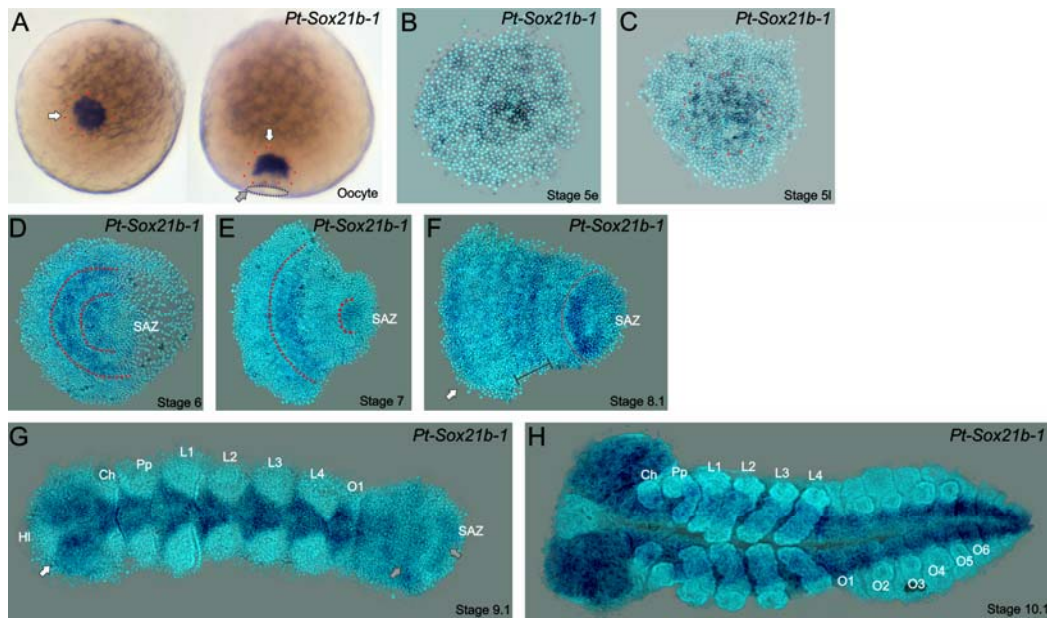

659

660 **Figure 1. Expression of *Sox21b-1* in *P. tepidariorum* oocytes and**  
661 **embryos**

662 **A)** Dorsal (left) and lateral (right) views of pre-vitellogenic oocytes showing  
663 *Sox21b-1* mRNA in the Balbiani's body (red dashed circle and white arrows).  
664 The sperm implantation groove is indicated by a black dashed circle and grey  
665 arrow. **B)** At early stage 5, the expression of *Sox21b-1* appears in a salt and  
666 pepper pattern in the germ disc. **C)** Expression in the cumulus becomes  
667 stronger at late stage 5, with less expression at the periphery of the germ disc  
668 (dashed red circle). **D)** At stage 6 *Sox21b-1* is expressed in a broad stripe in  
669 the anterior (between the red dashed lines). **E)** At stage 7 there is expression  
670 in the region of the presumptive leg bearing segments and in the SAZ (both  
671 indicated by red dashed lines). **F)** At stage 8.1 *Sox21b-1* is still expressed in  
672 the SAZ and the presumptive leg bearing segments, but nascent expression  
673 is observed at the anterior of the germ band (indicated by the white arrows  
674 and black brackets). **G)** At stage 9.1, when the limb buds are visible the  
675 expression of *Sox21b-1* becomes restricted to the ventral nerve cord (anterior  
676 white arrow) and can be observed in the SAZ (posterior grey arrows). **H)** At  
677 stage 10.1, *Sox21b-1* expression is restricted to the ventral nerve cord and  
678 the head lobes. Ch: Chelicerae; HL: Head lobes; L1 to L4: Prosomal leg

679 bearing segments 1 to 4; O1 to O6: Opisthosomal segments 1 to 6; SAZ:  
680 Segment addition zone. Ventral views are shown with anterior to the left,  
681 except as described for oocytes.  
682

683

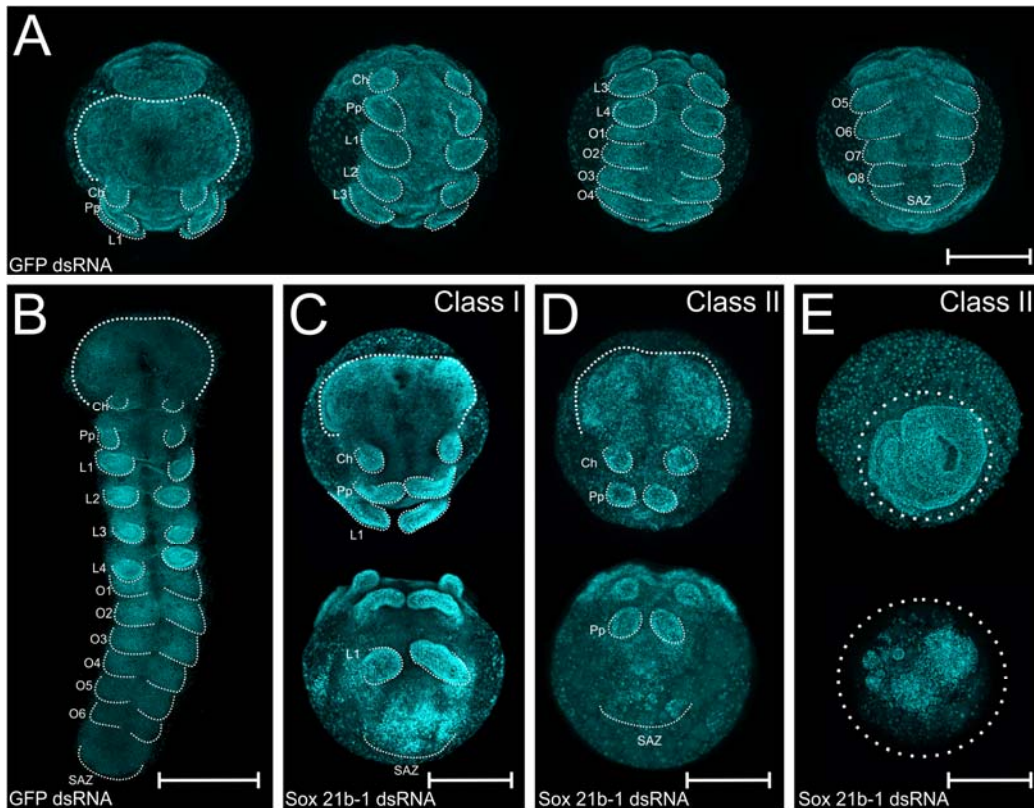

684

685 **Figure 2. Embryo phenotypes after *Sox21b-1* parental RNAi knockdown**

686 Whole mount (A) and flat mount (B) control embryos at stage 9 stained with  
687 DAPI. Stage 9, Class I (C), Class II (D) and Class III (E) phenotypes from  
688 *Sox21b-1* knockdown. In the control embryos (A and B), the head, cheliceral  
689 (Ch), pedipalpal (Pp), prosomal walking limbs (L1 to L4), opisthosomal  
690 segments (O1 to O6) and a posterior SAZ are all clearly visible as indicated.  
691 C) Class I phenotype embryos show a morphologically normal head, pairs of  
692 chelicerae, pedipalps and first walking limbs (Ch, Pp, L1), but a disorganised  
693 cluster of cells in the posterior where L2-L4, opisthosomal segments and the  
694 SAZ should be. D) Class II phenotype embryos consist of fewer cells, but still  
695 form a head, chelicerae, pedipalps (Ch, Pp) and a structure resembling the  
696 SAZ in the posterior. E) Class III embryos exhibit the most severe phenotype,  
697 where, after the germ disc stage, the embryo fails to form an organised germ  
698 band. Anterior is to the top, scale bars: 150  $\mu$ m.

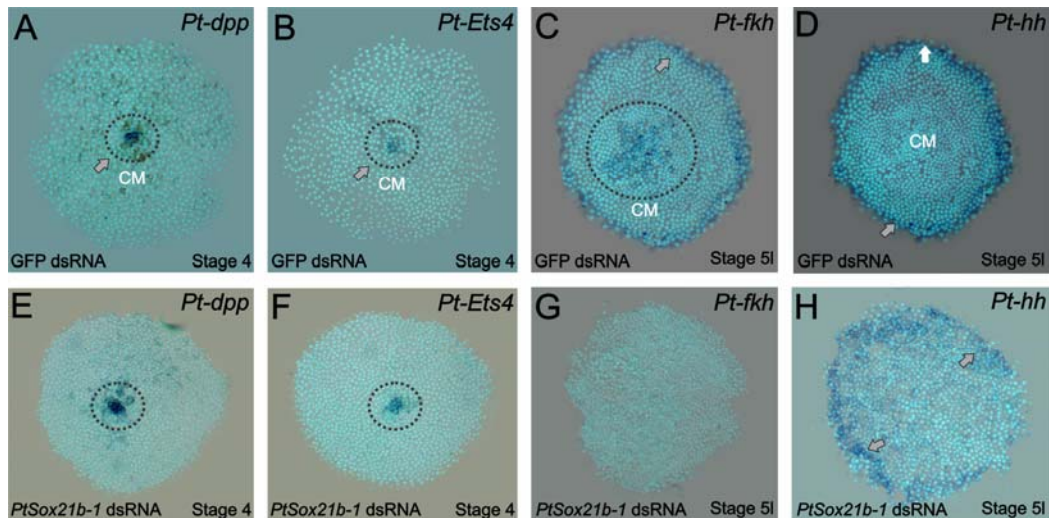

699

700 **Figure 3. Gene expression in control and Sox21b-1 knockdowns at the**  
701 **germ disc stage**

702 *Pt-dpp* (A) and *Pt-Ets4* (B) are expressed in the forming cumulus (CM) in the  
703 centre of the germ disc at stage 4 (grey arrow and dotted circle). This  
704 expression is unaffected by knockdown of *Sox21b-1* (E and F) (n= 30 for each  
705 gene). C) *Pt-fkh* is expressed at the rim and centre of the germ disc at late  
706 stage 5 (grey arrow and dotted circle in C), but expression is lost in *Sox21b-1*  
707 embryos (n= 30) (G). *Pt-hh* expression at the rim of the germ disc (D) is  
708 normal in *Sox21b-1* knockdown embryos (H) (grey arrows).



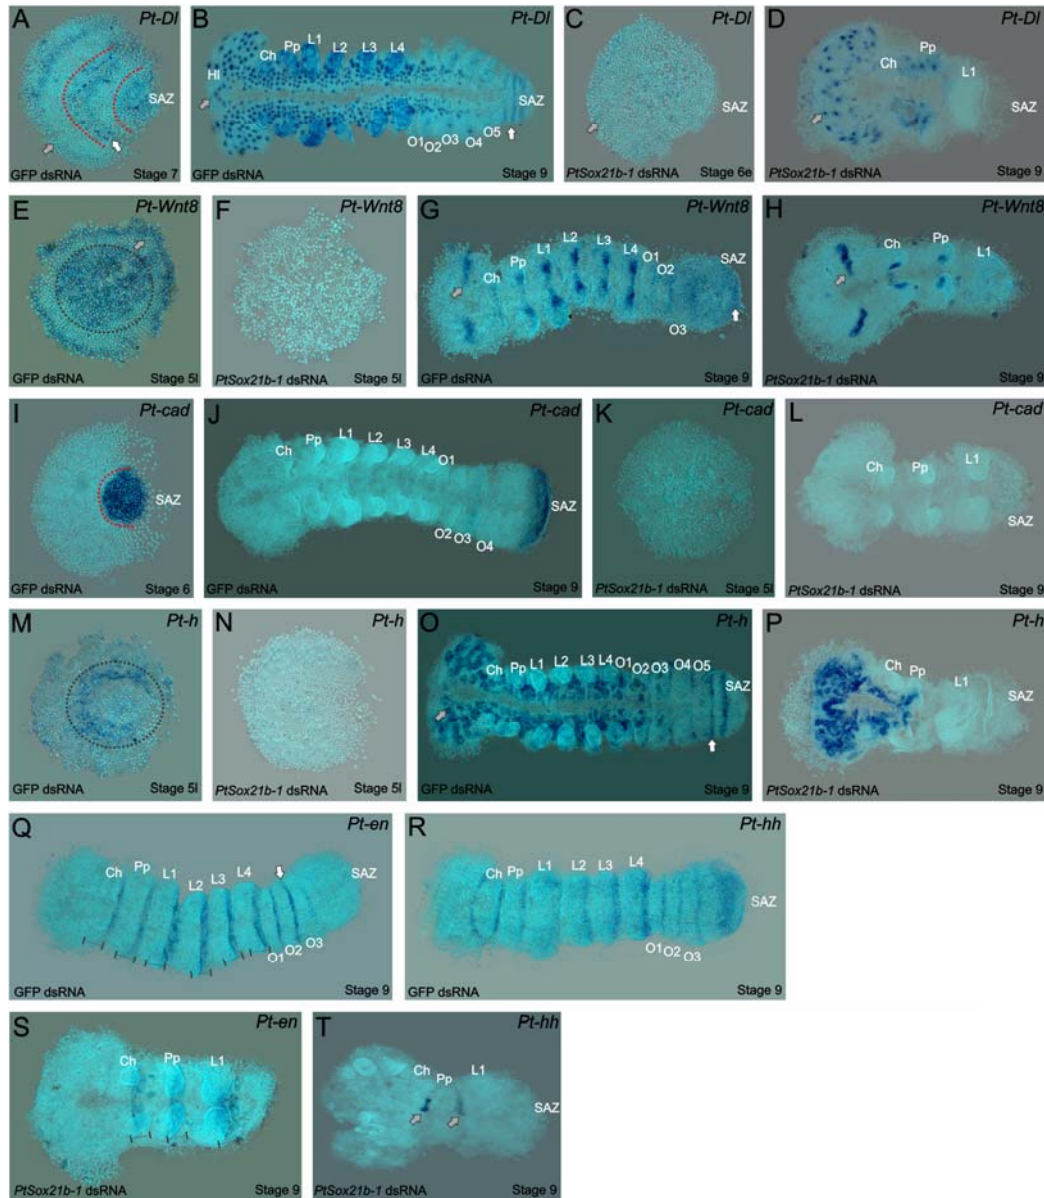

709

710

711

**Figure 4. Expression of segmentation genes in *Sox21b-1* pRNAi embryos**

712

713

714

715

716

717

718

719

**A and B** *Pt-Dl* expression at late stage 6/early stage 7 is dynamic in the SAZ and is also observed in the presumptive head region and prosoma of the embryo (red dotted lines and grey arrows). **B**) At stage 9, *Pt-Dl* expression is seen in the SAZ (white arrow) but is restricted to the clusters of proneural differentiation in the anterior region of the embryo (grey arrow in the head lobes). **C**) In *Sox21b-1* knockdown embryos, *Pt-Dl* expression is not detectable in late stage 5/early stage 6 embryos (grey arrow) but can still be observed in the anterior ventral neuroectoderm at stage 9 up to the pedipalpal

720 segment (n= 17 and n = 14 for stage 5 and 9, respectively) (**D**). *Pt-h*  
721 expression at stage 5 in control embryos is seen at the rim and in the centre  
722 of the germ disc (black dotted circle in **E**), which is lost in *Sox21b-1*  
723 knockdown embryos (**F**). At stage 9, *Pt-h* expression resembles *Pt-Dl*, both in  
724 the control and *Sox21b-1* knockdown embryos (**G** and **H**) (n= 15 for both  
725 stages). *Pt-Wnt8* expression is similar to *Pt-h* in stage 5 control embryos  
726 (black dotted circle in the centre, grey arrow to the rim) and is also lost in  
727 *Sox21b-1* knockdown embryos (n= 11) (**I** and **J**). Control embryos at stage 9  
728 show the expression of *Pt-Wnt8* in the medial region of the head (grey arrow),  
729 and in distal parts of each segment up to the SAZ (white arrow) (**K**). In  
730 *Sox21b-1* knockdown embryos at the same stage, the brain (grey arrow),  
731 cheliceral and pedipalpal expression is still present, but the posterior  
732 expression is lost (n= 17 for each stage) (**L**). *Pt-cad* is expressed in the SAZ  
733 at late stage 5/early stage 6 embryos (**M**), which persists throughout to stage  
734 9 control embryos (**N**). However, *Pt-cad* expression is lost upon *Sox21b-1*  
735 knockdown (n= 20 for each stage) (**O** and **P**). *Pt-en* expression is present in  
736 the posterior of each segment (black lines in **Q**), and in cheliceral, pedipalpal  
737 and L1 segments in *Sox21b-1* knockdown embryos at stage 9 (n= 10) (**S**). *Pt-*  
738 *hh* expression in control embryos at stage 9 is seen in the posterior of each  
739 segment and in the SAZ (**R**). When *Sox21b-1* is knocked-down, *Pt-hh*  
740 embryos show expression in the middle posterior of the cheliceral and  
741 pedipalpal segments (n= 8) (**T**). Ch: Chelicerae; HL: Head Lobes; L1 to L4:  
742 Prosomal leg bearing segments; O1 to O5: Opisthosomal segments; SAZ:  
743 Segment Addition Zone. Anterior is to the left in stage 9 embryos.



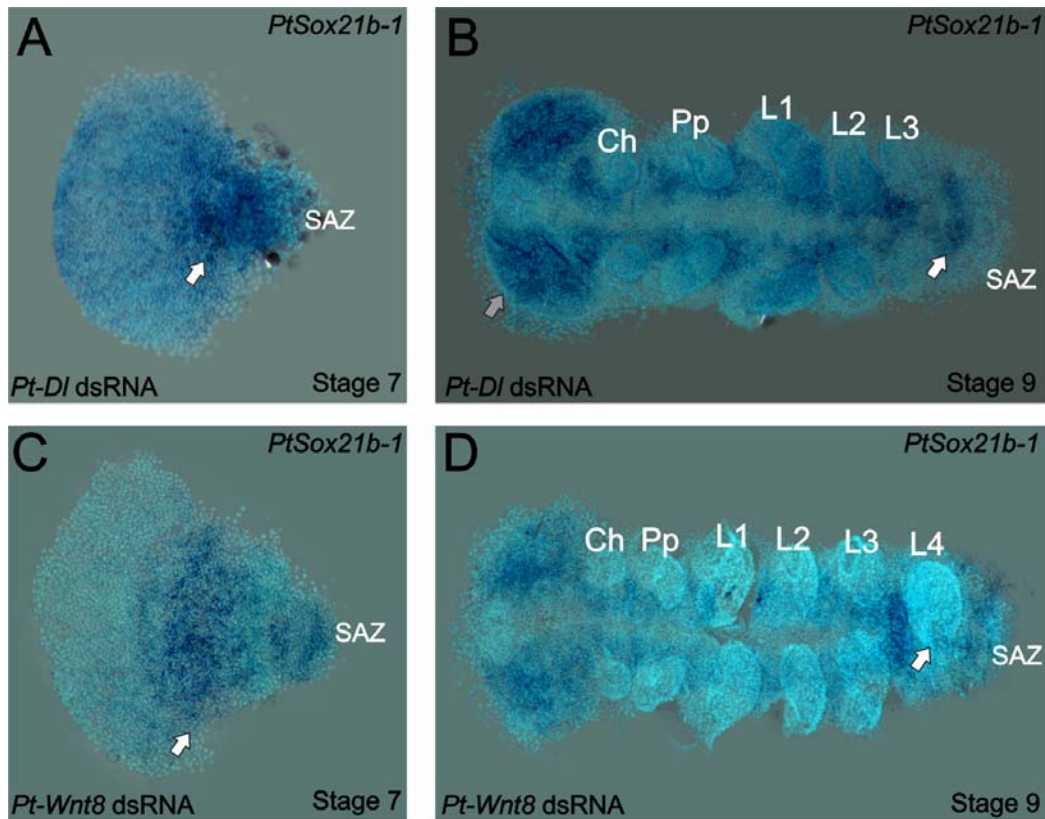

744

745 **Figure 5. Expression of *Sox21b-1* in *Dl* and *Wnt8* pRNAi embryos**

746 Ventral view of stage 7 and 9 knockdown embryos for *Pt-Dl* (A and B) and *Pt-*  
747 *Wnt8* (C and D). In knockdown embryos for both *Pt-Dl* and *Pt-Wnt8*, *Sox21b-1*  
748 is still expressed at the germ band stage (A and C), in a dynamic pattern in  
749 the remaining SAZ cells, and in the forming segments in the presumptive  
750 prosoma of the embryo (white arrows). In stage 9 *Pt-Wnt8* knockdown  
751 embryos, *Sox21b-1* remains highly expressed in the ventral nerve cord (D).  
752 *Pt-Dl* knockdown embryos lack the posterior L4 segment (white arrow), but  
753 brain formation appears normal (grey arrow) (B). *Pt-Wnt8* embryos show a  
754 fusion of the L4 limb buds, and *Sox21b-1* is still expressed in the remaining  
755 SAZ cells (D). Anterior is to the left in all panels.

756

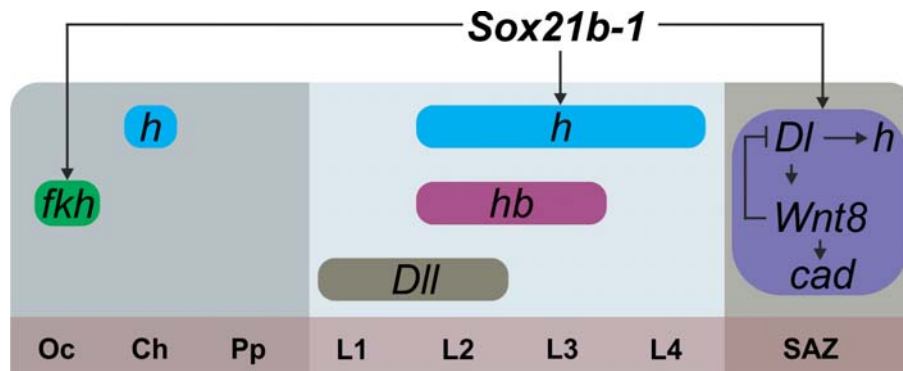

757

758 **Figure 6. Summary of the regulation of spider segmentation**

759 The interaction of *Sox21b-1* is presented in relation to genes involved in  
760 spider embryogenesis. We found that *fkh* expression requires *Sox21b-1* in the  
761 most anterior part of the head (OC, Ch, Pp segments). In the prosoma  
762 *Sox21b-1* has a gap gene like function and is required for the expression of  
763 *hairy*, while *Distal-less* (12) and *hunchback* (11) also act as gap genes during  
764 prosomal segmentation (L1-L4). The molecular control of segmentation in the  
765 SAZ involves a feedback loop between *Dl* and *Wnt8*, which acts upstream of  
766 *cad* and also controls the dynamic expression of *hairy* (15). We can infer from  
767 our results that *Sox21b-1* acts upstream of these genes in the SAZ.

768

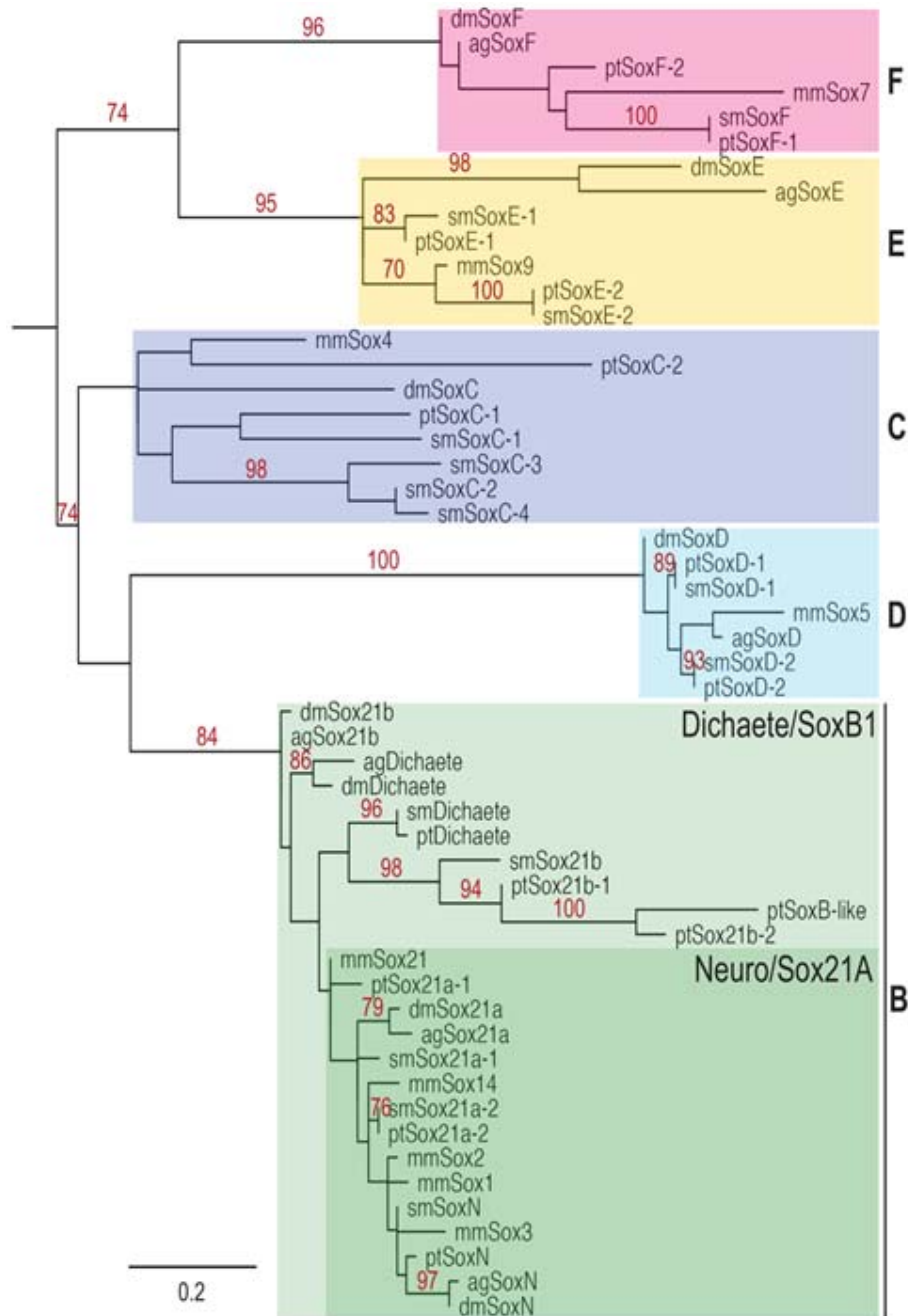

769

770 **Supplementary Figure 1. RAxML phylogeny of eumetazoan Sox genes.**

771 Phylogenetic tree made with RAxML algorithm showing the relationship  
 772 between *Anopheles gambiae* (Ag), *Mus musculus* (Mm), *D. melanogaster*  
 773 (*Dm*), *P. tepidariorum* (Pt) and *S. mimosarum* (Sm) Sox proteins based on  
 774 HMG domain sequences.

775

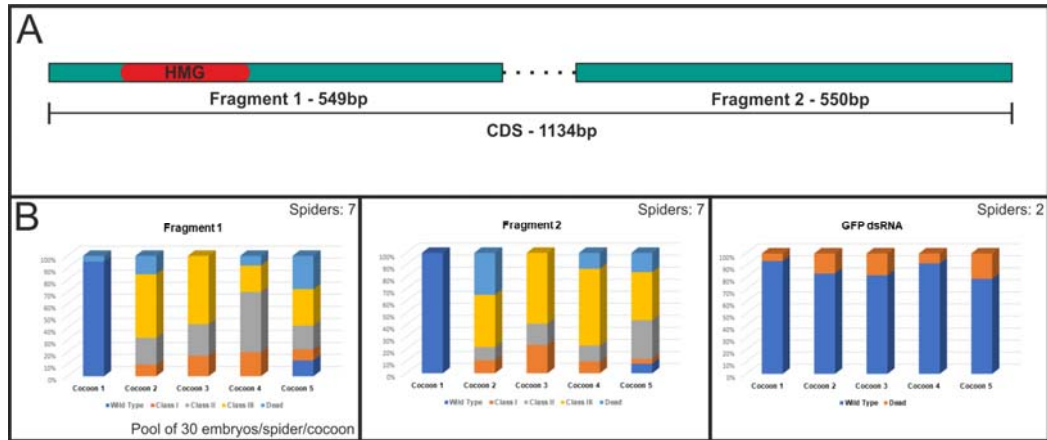

776

777 **Supplementary Figure 2. dsRNA design and phenotypical class**  
778 **frequencies for each fragment and GFP control injections**

779 **A)** Two non-overlapping fragments were designed for the *Sox21b-1* coding  
780 sequence. Fragment 1 contains the HMG conserved domain (549 bp) and  
781 fragment 2 has no conserved domains (550 bp). **B)** Frequencies for each  
782 fragment, cocoon number and phenotypic class. Seven spiders were injected  
783 for each *Pt-Sox21b-1* fragment and two spiders for the GFP dsRNA controls.  
784 For the phenotypical class frequencies, 30 embryos per spider per cocoon  
785 were pooled, DAPI stained and analysed (total n= 210 for each).

786

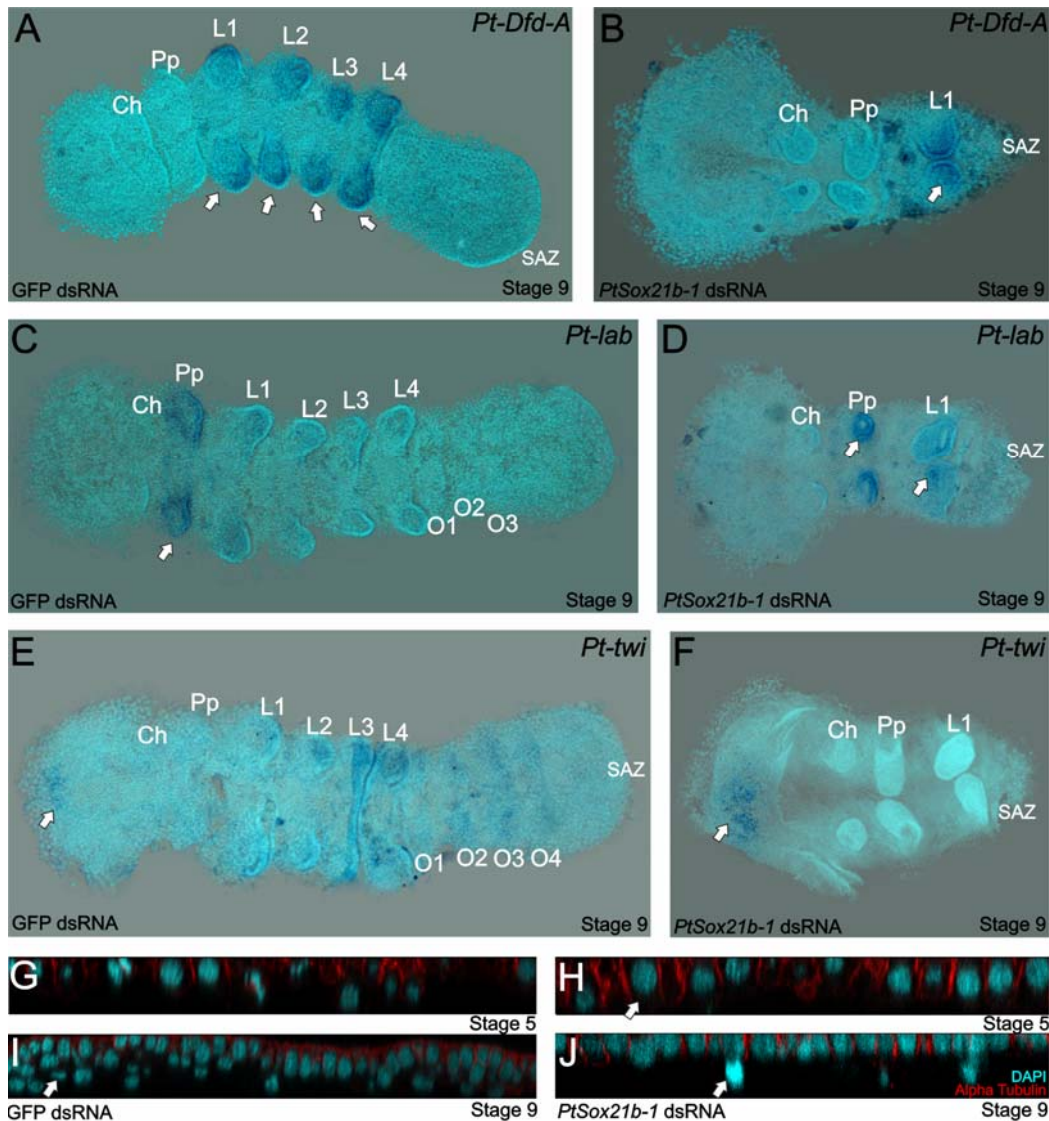

787

788 **Supplementary Figure 3. Homeotic and mesodermal gene expression at**  
789 **stage 9 in *Sox21b-1* pRNAi embryos**

790 **A)** Ventral view showing *Pt-Dfd-A* expression in the limb buds of L1 to L4  
791 segments in the control embryos (white arrows). **B)** Expression of *Pt-Dfd-A*  
792 is also observed in L1 in *Sox21b-1* pRNAi embryos (n = 9) (white arrow in **B**). **C)**  
793 *Pt-lab* is expressed in the pedipalpal segment and faintly in L1 segment in  
794 control embryos (white arrow in **D**). In *Sox21b-1* pRNAi embryos, *Pt-lab*  
795 expression can still be observed in the pedipalpal and L1 segments (n = 10)  
796 (white arrows in **D**). **E)** The mesodermal marker *Pt-twi* is expressed in the  
797 anterior-most medial region of the head, limb buds of L1 to L4, and with a  
798 striped pattern in the O1 to O4 segments. **F)** In *Sox21b-1* knockdown  
799 embryos, only the head expression is maintained (n= 14) (white arrow in **F**).

800 **G-J** show orthogonal projections of the cumulus (stage 5) and the head (stage  
801 9) at 40x magnification of whole mount control embryos (left panels) and  
802 *Sox21b-1* knockdown embryos (right panels), respectively. In control embryos  
803 the formation of subectodermal layers are visible, which are lost in the  
804 knockdown embryos. DAPI stained nuclei are shown in cyan and the  
805 membrane marker alpha-Tubulin in red. Anterior is to the left in all panels.  
806



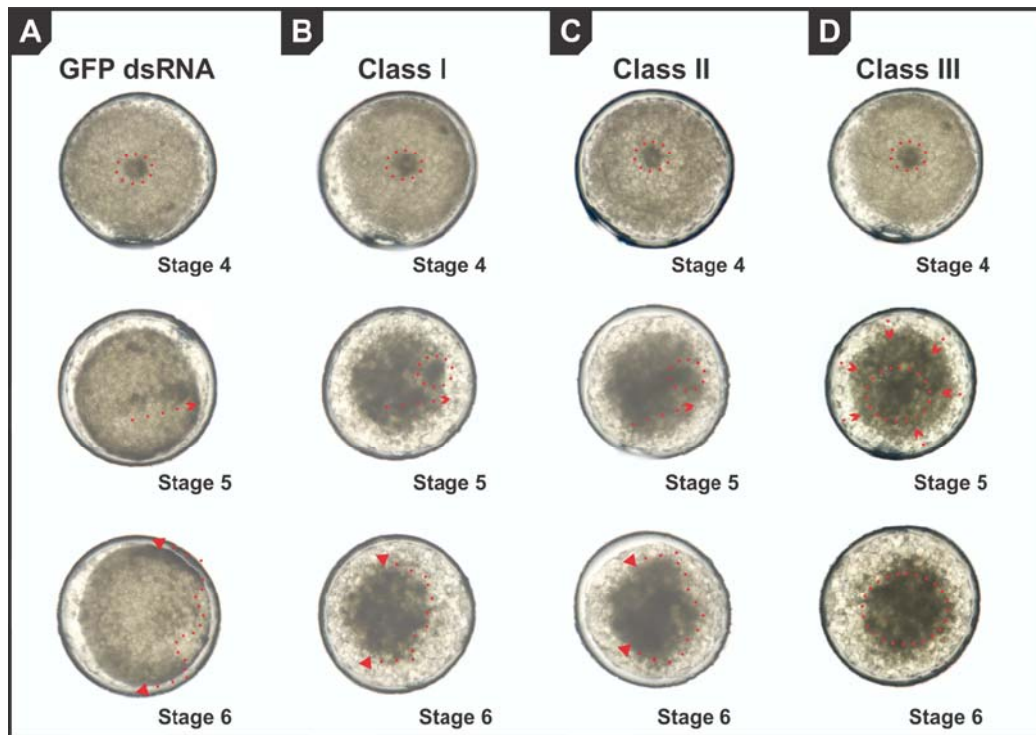

807

808 **Supplementary Figure 4. Snapshots from live imaged videos in control**  
809 **and *Sox21b-1* knockdown embryos**

810 Ventral view of the germ disc in **A**) GFP dsRNA control embryos, showing the  
811 cumulus formation (red dotted lines), cumulus migration (red dotted arrow)  
812 and dorsal field opening (red dotted line and arrows). **B**) Class I *Sox21b-1*  
813 knockdown embryos showing cumulus formation, the partial migration of  
814 mesenchymal cells and limited dorsal field opening, which is also seen but  
815 more severely disrupted in Class II embryos (**C**), and absent in class III (**D**).  
816 Anterior is to the left, opposite to cumulus migration.

817

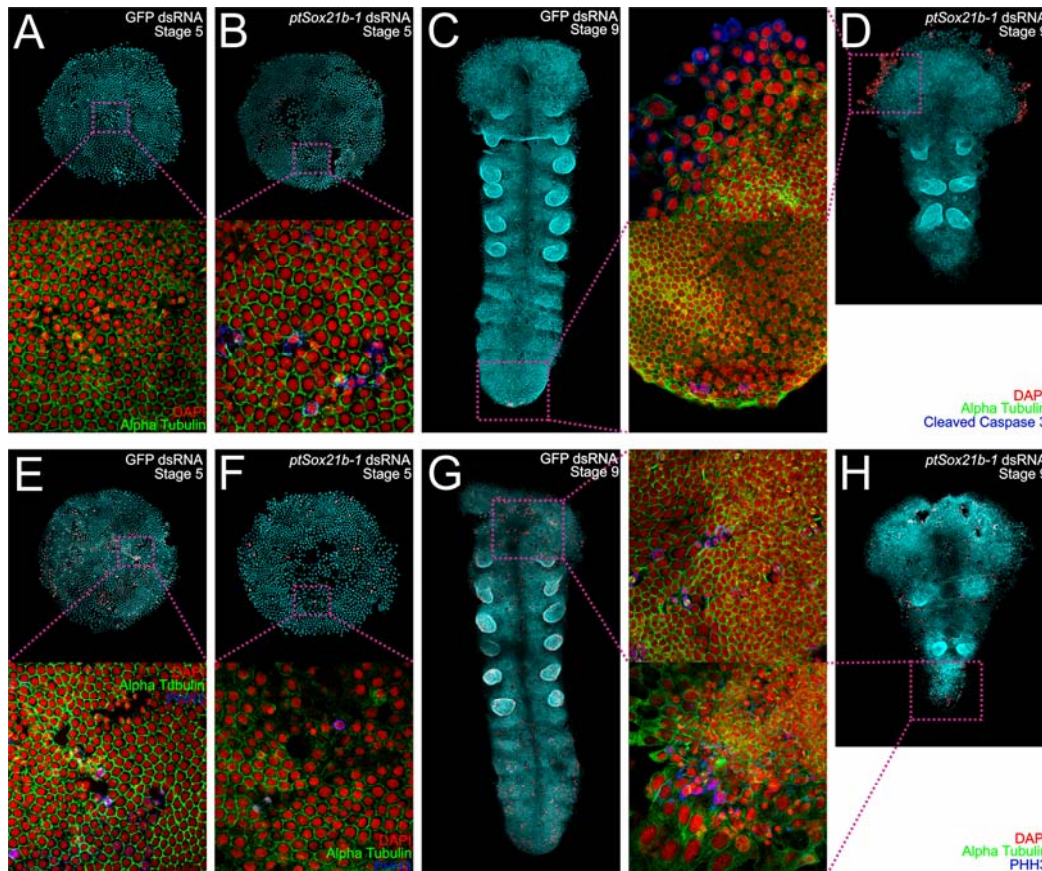

818

819 **Supplementary Figure 5. Cell death and cell proliferation in *Sox21b-1***  
820 **knockdown embryos**

821 Ventral view of stage 5 control embryos stained for Cleaved-Caspase3 (A)  
822 and PHH3 (E). Cell death is not detectable in control embryos, but a high level  
823 of proliferation can be seen. In *Sox21b-1* knockdown embryos, clusters of  
824 cells undergoing cell death can be found (B), as well as a decrease in  
825 proliferation in the knockdown embryos compared to controls (n= 15 for each  
826 staining) (F). Embryos at stage 9 stained for Cleaved-Caspase 3 (C) and  
827 PHH3 (G) show that only a small amount of cell death occurs in the SAZ, and  
828 that there is proliferation detectable throughout the entire embryo. Cell death  
829 is visible in the head extraembryonic layer in *Sox21b-1* pRNAi embryos (D),  
830 and less proliferation is detected in stage 9 knockdown embryos (n= 15 for  
831 each staining). Anterior is to the top. Magnifications are 100X and 400x  
832 respectively.

833

834

835



836 **Table S1. List of primers used in this paper.**

| Oligonucleotide name                   | Sequence (5' to 3')                                 |
|----------------------------------------|-----------------------------------------------------|
| In situ Hybridization probes - Cloning |                                                     |
| Caudal_fw                              | CCCATGCGGAGTTATGGACA                                |
| Caudal_rv                              | GTCCTGGTTCTGCCTGGATT                                |
| Dfd_A_fw                               | CCCCTGTAAGTTATGGCCC                                 |
| Dfd_A_rv                               | AGCACTGGGTTGCTGTTTCT                                |
| Dpp_fw                                 | ATGCGCCAGCGCATTGTTGGCT                              |
| Dpp_rv                                 | ACGGCAACCACATCCTTCAACAAC                            |
| Delta_fw                               | CTGTCGTTTGGGTTGGCAAG                                |
| Delta_rv                               | CCCCATTGAGGCATGGTTCT                                |
| Engrailed_fw                           | ATGATACCAATGAGAACTCGA                               |
| Engrailed_rv                           | CCATTAATTGCAATGCCAGT                                |
| Ets4_fw                                | AGGTCCACCTCCCTATGT                                  |
| Ets4_rv                                | ACGCTCAACGTCACAGGA                                  |
| Fkh_fw                                 | CATGCCCATGTCCCTCAAC                                 |
| Fkh_rv                                 | AAGCGTTTTTGGCGCCTTAG                                |
| Hairy_fw                               | AAATACGGCCACAGTCAGGG                                |
| Hairy_rv                               | ATCCGAGCTTATGCTCACCG                                |
| Hedgehog_fw                            | GTGCCTGGCCGCATTAGTG                                 |
| Hedgehog_rv                            | TGAGTCACCATCGAAACATC                                |
| Labial_fw                              | GGACAACACGTGCAGGACA                                 |
| Labial_rv                              | AGCTGAAACAGACGCTCCTC                                |
| Sox21b-1_fw                            | ATGCAAGCTCCGCAAATCGTACAAAA                          |
| Sox21b-1_rv                            | TTACATCTGTAATGGCATGCCACG                            |
| Twist_fw                               | ACGTTAGGACGAATCCACTG                                |
| Twist_rv                               | CTGGGCTCTCTGAACCTG                                  |
| Wnt8_fw                                | CTATGCAGACAGCGTTGCTATTG                             |
| Wnt8_rv                                | GGTCAAATTTTCATTGTAGATTAGCTGG                        |
| dsRNA synthesis                        |                                                     |
| DI_dsRNA_fw                            | TAATACGACTCACTATAGGATGTAAGCGAGTTCTGGACTCAAG<br>ACA  |
| DI_dsRNA_rv                            | TAATACGACTCACTATAGGCACGTTCCCTCCATTAGAGCACGGC<br>TTG |
| GFP_dsRNA_fw                           | TAATACGACTCACTATAGGCGTGTCCGGCGAGGGCGAGGG            |
| GFP_dsRNA_rv                           | TAATACGACTCACTATAGGAGGACCATGTGATCGCGCT              |
| Sox21b1_dsRNA_F1_fw                    | TAATACGACTCACTATAGGATGCAAGCTCCGCAAATCGTAC           |
| Sox21b1_dsRNA_F1_rv                    | TAATACGACTCACTATAGGAGAAGAGGCAGGATAGCCGC             |
| Sox21b1_dsRNA_F2_fw                    | TAATACGACTCACTATAGGTCAAGTGTCTGGATCAGCAGC            |
| Sox21b1_dsRNA_F2_rv                    | TAATACGACTCACTATAGGTTACATCTGTAATGGCATGCCAC          |
| Wnt8_dsRNA_fw                          | TAATACGACTCACTATAGGCTATGCAGACAGCGTTGCTATTG          |
| Wnt8_dsRNA_rv                          | TAATACGACTCACTATAGGGGTCAAATTTTCATTGTAGATTAGCT<br>GG |

837  
838  
839  
840  
841  
842

843 **Table S2.** Phenotypic frequencies for each fragment (1 and 2) and GFP  
 844 (control) dsRNA – 30 embryos per cocoon for each spider were pooled and  
 845 the characteristics were divided into three phenotypical classes.

846

| <b>Fragment 1</b> |                  |                |                 |                  |             |
|-------------------|------------------|----------------|-----------------|------------------|-------------|
|                   | <b>Wild Type</b> | <b>Class I</b> | <b>Class II</b> | <b>Class III</b> | <b>Dead</b> |
| <b>Cocoon 1</b>   | 205              |                |                 |                  | 5           |
| <b>Cocoon 2</b>   | 0                | 21             | 47              | 110              | 32          |
| <b>Cocoon 3</b>   | 0                | 35             | 54              | 121              |             |
| <b>Cocoon 4</b>   | 0                | 42             | 105             | 46               | 17          |
| <b>Cocoon 5</b>   | 27               | 19             | 41              | 63               | 39          |
|                   |                  |                |                 |                  |             |
| <b>Fragment 2</b> |                  |                |                 |                  |             |
|                   | <b>Wild Type</b> | <b>Class I</b> | <b>Class II</b> | <b>Class III</b> | <b>Dead</b> |
| <b>Cocoon 1</b>   | 210              |                |                 |                  |             |
| <b>Cocoon 2</b>   | 0                | 20             | 20              | 91               | 79          |
| <b>Cocoon 3</b>   | 0                | 49             | 37              | 124              |             |
| <b>Cocoon 4</b>   | 0                | 20             | 27              | 133              | 30          |
| <b>Cocoon 5</b>   | 16               | 8              | 67              | 84               | 35          |
|                   |                  |                |                 |                  |             |
| <b>GFP dsRNA</b>  |                  |                |                 |                  |             |
|                   | <b>Wild Type</b> | <b>Dead</b>    |                 |                  |             |
| <b>Cocoon 1</b>   | 56               | 4              |                 |                  |             |
| <b>Cocoon 2</b>   | 53               | 7              |                 |                  |             |
| <b>Cocoon 3</b>   | 50               | 10             |                 |                  |             |
| <b>Cocoon 4</b>   | 56               | 4              |                 |                  |             |
| <b>Cocoon 5</b>   | 48               | 12             |                 |                  |             |

847

848
